# Supplementary material for: Elucidation of the Mechanism of Action of Ginseng Against Acute Lung Injury/Acute Respiratory Distress Syndrome by a Network Pharmacology-Based Strategy
Source: Front Pharmacol. 2021 Jan 20;11:611794. doi: 10.3389/fphar.2020.611794 (PMC7970560; doi:10.3389/fphar.2020.611794)
Supplement: Supplementary file 1 [file datasheet1.xlsx]

## Sheet: Sheet1
Supplementary Datasheet S1 Putative targets interacted with 25 identified compounds
Compound name	Target symbol		Targets of identified compounds after removing the overlap
16-Oxoseratenediol	ACP1		ABCB1
16-Oxoseratenediol	ADORA3		ABCB11
16-Oxoseratenediol	AKR1B10		ABL1
16-Oxoseratenediol	ALOX5		ACACB
16-Oxoseratenediol	APP		ACKR3
16-Oxoseratenediol	AR		ACLY
16-Oxoseratenediol	ATP12A		ACP1
16-Oxoseratenediol	AURKA		ACSL3
16-Oxoseratenediol	BACE1		ACSL4
16-Oxoseratenediol	BCHE		ADA
16-Oxoseratenediol	CCKBR		ADH1C
16-Oxoseratenediol	CCND1		ADK
16-Oxoseratenediol	CCNE2		ADORA1
16-Oxoseratenediol	CCR1		ADORA2A
16-Oxoseratenediol	CD81		ADORA2B
16-Oxoseratenediol	CDC25A		ADORA3
16-Oxoseratenediol	CDC25B		ADRA1A
16-Oxoseratenediol	CDK2		ADSL
16-Oxoseratenediol	CES1		AGTR1
16-Oxoseratenediol	CES2		AKR1B1
16-Oxoseratenediol	CNR1		AKR1B10
16-Oxoseratenediol	CXCR3		AKR1C2
16-Oxoseratenediol	CYP17A1		AKR1C3
16-Oxoseratenediol	CYP19A1		AKR1D1
16-Oxoseratenediol	CYP24A1		AKT1
16-Oxoseratenediol	CYP51A1		ALDH1A1
16-Oxoseratenediol	ESR1		ALDH1A2
16-Oxoseratenediol	ESR2		ALDH3A1
16-Oxoseratenediol	FAAH		ALK
16-Oxoseratenediol	FABP1		ALOX5
16-Oxoseratenediol	FABP3		ALOX5AP
16-Oxoseratenediol	FABP4		APOA2
16-Oxoseratenediol	FABP5		APP
16-Oxoseratenediol	FDFT1		AR
16-Oxoseratenediol	FFAR1		ATP12A
16-Oxoseratenediol	FNTA		ATP1A1
16-Oxoseratenediol	G6PD		AURKA
16-Oxoseratenediol	GLUL		AURKB
16-Oxoseratenediol	GPBAR1		AVPR1A
16-Oxoseratenediol	GPR18		BACE1
16-Oxoseratenediol	GPR55		BCHE
16-Oxoseratenediol	GRM1		BCL2A1
16-Oxoseratenediol	HCRTR1		BCL2L1
16-Oxoseratenediol	HCRTR2		CA1
16-Oxoseratenediol	HMGCR		CA12
16-Oxoseratenediol	HSD11B1		CA2
16-Oxoseratenediol	HSD11B2		CA9
16-Oxoseratenediol	HSD17B3		CACNA1C
16-Oxoseratenediol	IDO1		CALM1
16-Oxoseratenediol	INCENP		CAPN2
16-Oxoseratenediol	KCNH2		CASP3
16-Oxoseratenediol	KDR		CASP7
16-Oxoseratenediol	LIMK2		CBFB
16-Oxoseratenediol	MAPK3		CCKBR
16-Oxoseratenediol	MDM2		CCNA2
16-Oxoseratenediol	NOS2		CCNC
16-Oxoseratenediol	NPC1L1		CCND1
16-Oxoseratenediol	NR1H3		CCNE1
16-Oxoseratenediol	NR1I2		CCNE2
16-Oxoseratenediol	NR1I3		CCNT1
16-Oxoseratenediol	NR3C1		CCR1
16-Oxoseratenediol	NR3C2		CCR2
16-Oxoseratenediol	PDE4D		CCR3
16-Oxoseratenediol	PFKFB3		CD81
16-Oxoseratenediol	PGR		CDC25A
16-Oxoseratenediol	PLA2G1B		CDC25B
16-Oxoseratenediol	POLB		CDC45
16-Oxoseratenediol	PPARA		CDC7
16-Oxoseratenediol	PPARD		CDK1
16-Oxoseratenediol	PPARG		CDK16
16-Oxoseratenediol	PREP		CDK17
16-Oxoseratenediol	PRKCH		CDK18
16-Oxoseratenediol	PTAFR		CDK2
16-Oxoseratenediol	PTGER4		CDK3
16-Oxoseratenediol	PTGES		CDK4
16-Oxoseratenediol	PTGS2		CDK5
16-Oxoseratenediol	PTPN1		CDK6
16-Oxoseratenediol	PTPN11		CDK7
16-Oxoseratenediol	PTPN2		CDK8
16-Oxoseratenediol	PTPN6		CDK9
16-Oxoseratenediol	PTPRF		CES1
16-Oxoseratenediol	RORA		CES2
16-Oxoseratenediol	RORC		CFD
16-Oxoseratenediol	S1PR1		CFTR
16-Oxoseratenediol	S1PR3		CHEK1
16-Oxoseratenediol	SCD		CHRM1
16-Oxoseratenediol	SERPINA6		CHRM2
16-Oxoseratenediol	SHBG		CHRNA7
16-Oxoseratenediol	SIGMAR1		CHUK
16-Oxoseratenediol	SLC6A2		CKB
16-Oxoseratenediol	SLC6A3		CKM
16-Oxoseratenediol	SLC6A4		CKMT1A
16-Oxoseratenediol	SRD5A1		CKMT1B
16-Oxoseratenediol	SRD5A2		CKMT2
16-Oxoseratenediol	TACR2		CLK1
16-Oxoseratenediol	TERT		CLK2
16-Oxoseratenediol	TNF		CLK3
16-Oxoseratenediol	TOP1		CLK4
16-Oxoseratenediol	TOP2A		CNR1
16-Oxoseratenediol	TTK		CNR2
Galactonic acid	ACLY		COL27A1
Galactonic acid	ADH1C		COX1
Galactonic acid	AKR1C2		COX2
Galactonic acid	AKR1D1		COX3
Galactonic acid	CACNA1C		COX4I1
Galactonic acid	CDC45		COX5A
Galactonic acid	CES1		COX5B
Galactonic acid	CFTR		COX6A2
Galactonic acid	CHRNA7		COX6B1
Galactonic acid	COX1		COX6C
Galactonic acid	COX2		COX7A1
Galactonic acid	COX3		COX7B
Galactonic acid	COX4I1		COX7C
Galactonic acid	COX5A		COX8A
Galactonic acid	COX5B		CRHR1
Galactonic acid	COX6A2		CRYL1
Galactonic acid	COX6B1		CSF1R
Galactonic acid	COX6C		CSNK1E
Galactonic acid	COX7A1		CTSB
Galactonic acid	COX7B		CTSL
Galactonic acid	COX7C		CXCR1
Galactonic acid	COX8A		CXCR2
Galactonic acid	CRYL1		CXCR3
Galactonic acid	EGLN1		CYP17A1
Galactonic acid	ESRRG		CYP19A1
Galactonic acid	FABP2		CYP24A1
Galactonic acid	FABP3		CYP2C19
Galactonic acid	FABP4		CYP2C9
Galactonic acid	FABP5		CYP2D6
Galactonic acid	FABP6		CYP3A4
Galactonic acid	FDFT1		CYP51A1
Galactonic acid	FECH		DGAT1
Galactonic acid	FFAR1		DHCR7
Galactonic acid	FNTA		DHFR
Galactonic acid	G6PD		DRD1
Galactonic acid	GINS2		DYRK1B
Galactonic acid	GINS4		EGFR
Galactonic acid	GPBAR1		EGLN1
Galactonic acid	HAO1		ELANE
Galactonic acid	HMGCR		ELOVL4
Galactonic acid	KDM2A		EPHA5
Galactonic acid	KDM5C		ESR1
Galactonic acid	MCM10		ESR2
Galactonic acid	NPC1L1		ESRRG
Galactonic acid	NR1H4		F10
Galactonic acid	PHF8		F2
Galactonic acid	PLA2G1B		F7
Galactonic acid	PPARA		FAAH
Galactonic acid	PPARD		FABP1
Galactonic acid	PTGER2		FABP2
Galactonic acid	PTGFR		FABP3
Galactonic acid	SLC22A6		FABP4
Galactonic acid	SLPI		FABP5
Galactonic acid	SRD5A2		FABP6
Galactonic acid	TOP1		FADS1
Galactonic acid	TOP1MT		FADS2
Galactonic acid	TOP2A		FDFT1
Galactonic acid	TOP2B		FECH
Galactonic acid	TOP3A		FFAR1
Galactonic acid	TOP3B		FGF1
Galactonic acid	TYR		FGF2
Galactonic acid	UGT2B7		FH
Ginsenoside F3	STAT3		FLT3
Ginsenoside F3	PTAFR		FNTA
Ginsenoside F3	IL2		G6PD
Ginsenoside F3	VEGFA		GABRA5
Ginsenoside F3	FGF1		GABRB3
Ginsenoside F3	FGF2		GAK
Ginsenoside F3	HPSE		GAMT
Ginsenoside F3	RORC		GATM
Ginsenoside F3	ATP1A1		GCK
Ginsenoside F3	PSEN2		GINS2
Ginsenoside F3	LGALS4		GINS4
Ginsenoside F3	LGALS3		GLI1
Ginsenoside F3	LGALS8		GLRA1
Ginsenoside F3	HSD11B2		GLRA2
Ginsenoside F3	HSD11B1		GLRA3
Ginsenoside I	STAT3		GLS
Ginsenoside I	VEGFA		GLS2
Ginsenoside I	FGF1		GLUL
Ginsenoside I	FGF2		GPBAR1
Ginsenoside I	HPSE		GPR18
Ginsenoside I	PSEN2		GPR55
Ginsenoside I	HSP90AA1		GPRC5A
Ginsenoside I	LGALS4		GRB2
Ginsenoside I	LGALS3		GRIA2
Ginsenoside I	LGALS8		GRIN2A
Ginsenoside I	IL2		GRM1
Ginsenoside I	CDK1		GRM5
Ginsenoside Ra1	STAT3		GSK3A
Ginsenoside Ra1	PTAFR		GSK3B
Ginsenoside Ra1	IL2		GUCY1A2
Ginsenoside Ra1	VEGFA		GYS1
Ginsenoside Ra1	FGF1		HAO1
Ginsenoside Ra1	FGF2		HCAR2
Ginsenoside Ra1	HPSE		HCRTR1
Ginsenoside Ra1	RORC		HCRTR2
Ginsenoside Ra1	ATP1A1		HMGCR
Ginsenoside Ra1	PSEN2		HMOX1
Ginsenoside Ra1	HSP90AA1		HPSE
Ginsenoside Ra1	LGALS4		HSD11B1
Ginsenoside Ra1	LGALS3		HSD11B2
Ginsenoside Ra1	LGALS8		HSD17B1
Ginsenoside Ra1	BCL2L1		HSD17B2
Ginsenoside Ra1	CDK1		HSD17B3
Ginsenoside Ra1	HSD11B2		HSD3B1
Ginsenoside Ra1	HSD11B1		HSD3B2(
Ginsenoside Rb1	STAT3		HSP90AA1
Ginsenoside Rb1	PTAFR		HTR1A
Ginsenoside Rb1	IL2		HTR1B
Ginsenoside Rb1	VEGFA		HTR2B
Ginsenoside Rb1	FGF1		HTR6
Ginsenoside Rb1	FGF2		ICAM1
Ginsenoside Rb1	HPSE		IDO1
Ginsenoside Rb1	RORC		IGF1R
Ginsenoside Rb1	ATP1A1		IKBKB
Ginsenoside Rb1	PSEN2		IL13
Ginsenoside Rb1	HSP90AA1		IL1B
Ginsenoside Rb1	LGALS4		IL2
Ginsenoside Rb1	LGALS3		INCENP
Ginsenoside Rb1	LGALS8		INMT
Ginsenoside Rb1	BCL2L1		IRAK4
Ginsenoside Rb1	CDK1		ITGAL
Ginsenoside Rb1	HSD11B2		ITK
Ginsenoside Rb1	HSD11B1		JAK2
Ginsenoside Rb2	STAT3		JUN
Ginsenoside Rb2	PTAFR		KCNA3
Ginsenoside Rb2	IL2		KCNH2
Ginsenoside Rb2	VEGFA		KDM2A
Ginsenoside Rb2	FGF1		KDM5C
Ginsenoside Rb2	FGF2		KDR
Ginsenoside Rb2	HPSE		KIF11
Ginsenoside Rb2	ATP1A1		KIT
Ginsenoside Rb2	PSEN2		LCK
Ginsenoside Rb2	HSP90AA1		LGALS3
Ginsenoside Rb2	LGALS4		LGALS4
Ginsenoside Rb2	LGALS3		LGALS8
Ginsenoside Rb2	LGALS8		LGALS9
Ginsenoside Rb2	BCL2L1		LIMK2
Ginsenoside Rb2	CDK1		LPCAT1
Ginsenoside Rb2	HSD11B2		LSS
Ginsenoside Rb2	HSD11B1		MAOB
Ginsenoside Rb3	STAT3		MAP2K1
Ginsenoside Rb3	PTAFR		MAP3K14
Ginsenoside Rb3	IL2		MAP3K8
Ginsenoside Rb3	VEGFA		MAPK1
Ginsenoside Rb3	FGF1		MAPK10
Ginsenoside Rb3	FGF2		MAPK11
Ginsenoside Rb3	HPSE		MAPK14
Ginsenoside Rb3	ATP1A1		MAPK15
Ginsenoside Rb3	PSEN2		MAPK3
Ginsenoside Rb3	HSP90AA1		MAPK7
Ginsenoside Rb3	LGALS4		MAPK8
Ginsenoside Rb3	LGALS3		MAPK9
Ginsenoside Rb3	LGALS8		MCM10
Ginsenoside Rb3	BCL2L1		MDM2
Ginsenoside Rb3	CDK1		MDM4
Ginsenoside Rb3	HSD11B2		ME1
Ginsenoside Rb3	HSD11B1		ME2
Ginsenoside Rd	PTAFR		ME3
Ginsenoside Rd	IL2		MET
Ginsenoside Rd	STAT3		MGLL
Ginsenoside Rd	RORC		MKNK2
Ginsenoside Rd	ATP1A1		MLNR
Ginsenoside Rd	PSEN2		MMP9
Ginsenoside Rd	HSP90AA1		MTNR1A
Ginsenoside Rd	LGALS4		MTNR1B
Ginsenoside Rd	LGALS3		MTOR
Ginsenoside Rd	LGALS8		NLK
Ginsenoside Rd	BCL2L1		NOS2
Ginsenoside Rd	CDK1		NPC1L1
Ginsenoside Rd	HSD11B2		NR0B1
Ginsenoside Rd	HSD11B1		NR1H3
Ginsenoside Rd	VEGFA		NR1H4
Ginsenoside Rd	FGF1		NR1I2
Ginsenoside Rd	FGF2		NR1I3
Ginsenoside Rd	HPSE		NR3C1
Ginsenoside Rd1	PTAFR		NR3C2
Ginsenoside Rd1	STAT3		NR4A2
Ginsenoside Rd1	IL2		NTRK1
Ginsenoside Rd1	VEGFA		OPRD1
Ginsenoside Rd1	FGF1		P2RX3
Ginsenoside Rd1	FGF2		PAK1
Ginsenoside Rd1	HPSE		PDE10A
Ginsenoside Rd1	RORC		PDE2A
Ginsenoside Rd1	ATP1A1		PDE3A
Ginsenoside Rd1	PSEN2		PDE3B
Ginsenoside Rd1	HSP90AA1		PDE4B
Ginsenoside Rd1	LGALS4		PDE4D
Ginsenoside Rd1	LGALS3		PDGFRB
Ginsenoside Rd1	LGALS8		PDPK1
Ginsenoside Rd1	BCL2L1		PFKFB3
Ginsenoside Rd1	CDK1		PGGT1B
Ginsenoside Rd1	HSD11B2		PGK1
Ginsenoside Rd1	HSD11B1		PGR
Ginsenoside Re	STAT3		PHF8
Ginsenoside Re	PTAFR		PIK3CA
Ginsenoside Re	IL2		PIK3CB
Ginsenoside Re	VEGFA		PIK3CD
Ginsenoside Re	FGF1		PIK3CG
Ginsenoside Re	FGF2		PIM1
Ginsenoside Re	HPSE		PIM2
Ginsenoside Re	ATP1A1		PLA2G1B
Ginsenoside Re	PSEN2		PLK1
Ginsenoside Re	LGALS4		PLK3
Ginsenoside Re	LGALS3		PLK4
Ginsenoside Re	LGALS8		POLB
Ginsenoside Re	TOP1		PPARA
Ginsenoside Re	HSD11B2		PPARD
Ginsenoside Re	HSD11B1		PPARG
Ginsenoside Rf	PTAFR		PPM1A
Ginsenoside Rf	VEGFA		PPP1CC
Ginsenoside Rf	FGF1		PREP
Ginsenoside Rf	FGF2		PRF1
Ginsenoside Rf	HPSE		PRKCA
Ginsenoside Rf	STAT3		PRKCB
Ginsenoside Rf	RORC		PRKCE
Ginsenoside Rf	ATP1A1		PRKCG
Ginsenoside Rf	PSEN2		PRKCH
Ginsenoside Rf	HSP90AA1		PRKCQ
Ginsenoside Rf	LGALS4		PRKDC
Ginsenoside Rf	LGALS3		PSEN2
Ginsenoside Rf	LGALS8		PTAFR
Ginsenoside Rf	CDK1		PTGER2
Ginsenoside Rf	IL2		PTGER4
Ginsenoside Rf	HSD11B2		PTGES
Ginsenoside Rf	ADORA1		PTGFR
Ginsenoside Rf	ADORA2A		PTGS1
Ginsenoside Rg1	STAT3		PTGS2
Ginsenoside Rg1	IL2		PTPA
Ginsenoside Rg1	PTAFR		PTPN1
Ginsenoside Rg1	VEGFA		PTPN11
Ginsenoside Rg1	FGF1		PTPN2
Ginsenoside Rg1	FGF2		PTPN6
Ginsenoside Rg1	HPSE		PTPRF
Ginsenoside Rg1	ATP1A1		PYGL
Ginsenoside Rg1	TYMS		RARA
Ginsenoside Rg1	PSEN2		RARB
Ginsenoside Rg1	TACR2		RARG
Ginsenoside Rg1	HSP90AA1		RARRES1
Ginsenoside Rg1	IGF1R		RASGRP3
Ginsenoside Rg1	LGALS4		REN
Ginsenoside Rg1	LGALS3		RHAG
Ginsenoside Rg1	LGALS8		ROCK1
Ginsenoside Rg1	OPRD1		ROCK2
Ginsenoside Rg2	STAT3		RORA
Ginsenoside Rg2	VEGFA		RORC
Ginsenoside Rg2	FGF1		ROS1
Ginsenoside Rg2	FGF2		RPS6KA3
Ginsenoside Rg2	HPSE		RPS6KA4
Ginsenoside Rg2	RORC		RPS6KB1
Ginsenoside Rg2	ATP1A1		RXRA
Ginsenoside Rg2	F2		RXRB
Ginsenoside Rg2	HSD11B2		RXRG
Ginsenoside Rg2	SLC28A2		S1PR1
Ginsenoside Rg2	REN		S1PR2
Ginsenoside Rg2	TYMS		S1PR3
Ginsenoside Rg3	STAT3		SC5D
Ginsenoside Rg3	PTAFR		SCARB1
Ginsenoside Rg3	IL2		SCD
Ginsenoside Rg3	VEGFA		SCN9A
Ginsenoside Rg3	FGF1		SDHB
Ginsenoside Rg3	FGF2		SELE
Ginsenoside Rg3	HPSE		SERPINA6
Ginsenoside Rg3	LGALS4		SERPINB7
Ginsenoside Rg3	LGALS3		SHBG
Ginsenoside Rg3	LGALS8		SHH
Ginsenoside Rg3	CDK1		SIGMAR1
Ginsenoside Rg3	BCL2L1		SIRT2
Ginsenoside Rg3	ATP1A1		SLC10A2
Ginsenoside Rg3	HSD11B2		SLC16A1
Ginsenoside Rg3	HSD11B1		SLC16A12
Ginsenoside Rg3	PSEN2		SLC22A6
Ginsenoside Rg6	IL2		SLC28A2
Ginsenoside Rg6	PTAFR		SLC5A1
Ginsenoside Rg6	VEGFA		SLC5A2
Ginsenoside Rg6	FGF1		SLC6A2
Ginsenoside Rg6	FGF2		SLC6A3
Ginsenoside Rg6	HPSE		SLC6A4
Ginsenoside Rg6	RORC		SLC6A8
Ginsenoside Rg6	ATP1A1		SLC8A1
Ginsenoside Rg6	LGALS4		SLC9A1
Ginsenoside Rg6	LGALS3		SLPI
Ginsenoside Rg6	LGALS8		SMO
Ginsenoside Rg6	STAT3		SORD
Ginsenoside Rg6	F2		SRD5A1
Ginsenoside Rg6	SLC5A2		SRD5A2
Ginsenoside Rg6	SLC5A1		STAT3
Ginsenoside Rg6	HSP90AA1		STK16
Ginsenoside Rh2	STAT3		SYK
Ginsenoside Rh2	IL2		TACR1
Ginsenoside Rh2	PTAFR		TACR2
Ginsenoside Rh2	HSP90AA1		TBXAS1
Ginsenoside Rh2	PSEN2		TERT
Ginsenoside Rh2	VEGFA		TKT
Ginsenoside Rh2	FGF1		TNF
Ginsenoside Rh2	FGF2		TOP1
Ginsenoside Rh2	HPSE		TOP1MT
Ginsenoside Rh2	ATP1A1		TOP2A
Ginsenoside Rh2	RORC		TOP2B
Ginsenoside Rh2	ALOX5AP		TOP3A
Ginsenoside Rh2	TYMS		TOP3B
Ginsenoside Rh2	PFKFB3		TRPV1
Ginsenoside Rh2	S1PR1		TTK
Ginsenoside Rh2	LGALS4		TYMS
Ginsenoside Rh2	LGALS3		TYR
Ginsenoside Rh2	LGALS8		UGT2B7
Ginsenoside Rh2	BCL2L1		UPP1
Ginsenoside Rh2	KDR		VDR
Ginsenoside Rh2	HSD11B2		VEGFA
Ginsenoside Rh2	BCL2A1
Ginsenoside Rh2	RHAG
Ginsenoside Rh4	STAT3
Ginsenoside Rh4	IL2
Ginsenoside Rh4	HSP90AA1
Ginsenoside Rh4	BCL2L1
Ginsenoside Rh4	PSEN2
Ginsenoside Rh4	AR
Ginsenoside Rh4	MMP9
Ginsenoside Rh4	NR3C1
Ginsenoside Rh4	MAPK1
Ginsenoside Rh4	PIM1
Ginsenoside Rh4	PIM2
Ginsenoside Rh4	MTOR
Ginsenoside Rh4	PIK3CA
Ginsenoside Rh4	PTAFR
Ginsenoside Rh4	ADORA1
Ginsenoside Rh4	ADORA3
Ginsenoside Rh4	GRB2
Ginsenoside Rh4	MKNK2
Ginsenoside Rh4	FLT3
Ginsenoside Rh4	CDK4
Ginsenoside Rh4	PDE4B
Ginsenoside Rh4	MET
Ginsenoside Rh4	F7
Ginsenoside Rh4	SIRT2
Ginsenoside Rh4	NTRK1
Ginsenoside Rh4	TYMS
Ginsenoside Rh4	DHFR
Ginsenoside Rh4	SYK
Ginsenoside Rh4	MAP2K1
Ginsenoside Rh4	SLC5A2
Ginsenoside Rh4	S1PR1
Ginsenoside Rh4	CCNE1
Ginsenoside Rh4	MAPK14
Ginsenoside Rh4	CDK5
Ginsenoside Rh4	SLC5A1
Ginsenoside Rh4	GABRA5
Ginsenoside Rh4	HTR1A
Ginsenoside Rh4	CDK2
Ginsenoside Rh4	ATP1A1
Ginsenoside Rh4	ADORA2A
Ginsenoside Rh4	TBXAS1
Ginsenoside Rh4	AKR1B1
Ginsenoside Rh4	MAOB
Ginsenoside Rh4	PPARG
Ginsenoside Rh4	CYP2C9
Ginsenoside Rh4	ABCB11
Ginsenoside Rh4	HSD11B1
Ginsenoside Rh4	CFD
Ginsenoside Rh4	MAP3K14
Ginsenoside Rh4	PFKFB3
Ginsenoside Rh4	PRF1
Ginsenoside Rh4	PDPK1
Ginsenoside Rh4	CCND1
Ginsenoside Rh4	CDK1
Ginsenoside Rh4	EGFR
Ginsenoside Rh4	MAPK8
Ginsenoside Rh4	MAPK9
Ginsenoside Rh4	AURKB
Ginsenoside Rh4	JAK2
Ginsenoside Rh4	CHEK1
Ginsenoside Rh4	AURKA
Ginsenoside Rh4	VEGFA
Ginsenoside Rh4	FGF1
Ginsenoside Rh4	FGF2
Ginsenoside Rh4	CDK6
Ginsenoside Rh4	ADORA2B
Ginsenoside Rh4	PAK1
Ginsenoside Rh4	CDC25B
Ginsenoside Rh4	CSF1R
Ginsenoside Rh4	PDE2A
Ginsenoside Rh4	SLC28A2
Ginsenoside Rh4	ATP1A1
Ginsenoside Rh4	NR3C1
Ginsenoside Rk3	STAT3
Ginsenoside Rk3	IL2
Ginsenoside Rk3	PSEN2
Ginsenoside Rk3	HSP90AA1
Ginsenoside Rk3	VEGFA
Ginsenoside Rk3	FGF1
Ginsenoside Rk3	FGF2
Ginsenoside Rk3	BCL2L1
Ginsenoside Rk3	MTOR
Ginsenoside Rk3	PIK3CA
Ginsenoside Rk3	ATP1A1
Ginsenoside Rk3	MAP2K1
Ginsenoside Rk3	SIRT2
Ginsenoside Rk3	TYMS
Ginsenoside Rk3	ALOX5
Ginsenoside Rk3	PPARG
Ginsenoside Rk3	REN
Ginsenoside Rk3	CDK2
Ginsenoside Rk3	PDE10A
Ginsenoside Rk3	BCL2A1
Ginsenoside Rk3	AURKB
Ginsenoside Rk3	PGK1
Ginsenoside Rk3	AURKA
Ginsenoside Rk3	SLC5A2
Ginsenoside Rk3	MAPK1
Ginsenoside Rk3	MAPK14
Ginsenoside Rk3	NTRK1
Ginsenoside Rk3	JAK2
Ginsenoside Rk3	CSF1R
Ginsenoside Rk3	GRB2
Ginsenoside Rk3	ADK
Ginsenoside Rk3	MAP3K14
Ginsenoside Rk3	AGTR1
Ginsenoside Rk3	PFKFB3
Ginsenoside Rk3	S1PR1
Ginsenoside Rk3	ALOX5AP
Ginsenoside Rk3	SLC5A1
Ginsenoside Rk3	PTAFR
Ginsenoside Rk3	HSD11B1
Ginsenoside Rk3	LIMK2
Ginsenoside Rk3	P2RX3
Ginsenoside Rk3	PTGES
Ginsenoside Rk3	CFD
Ginsenoside Rk3	CDC7
Ginsenoside Rk3	PRF1
Ginsenoside Ro	HSD11B2
Ginsenoside Ro	HSD11B1
Ginsenoside Ro	VDR
Ginsenoside Ro	BCL2L1
Ginsenoside Ro	GLI1
Ginsenoside Ro	GLRA1
Ginsenoside Ro	GLRA2
Ginsenoside Ro	JUN
Ginsenoside Ro	FDFT1
Ginsenoside Ro	PTAFR
Ginsenoside Ro	PSEN2
Ginsenoside Ro	PPM1A
Ginsenoside Ro	PTPA
Ginsenoside Ro	PPP1CC
Ginsenoside Ro	STAT3
Ginsenoside Ro	PRKCA
Ginsenoside Ro	F2
Ginsenoside Ro	ATP1A1
Ginsenoside Ro	GLRA3
Ginsenoside Ro	NR3C1
Ginsenoside Ro	GABRB3
Ginsenoyne C	KDR
Ginsenoyne C	UPP1
Ginsenoyne C	SYK
Ginsenoyne C	LCK
Ginsenoyne C	JAK2
Ginsenoyne C	ITK
Ginsenoyne C	ABL1
Ginsenoyne C	S1PR2
Ginsenoyne C	SORD
Ginsenoyne C	SLC5A2
Ginsenoyne C	SLC5A1
Ginsenoyne C	SCN9A
Ginsenoyne C	HTR1A
Ginsenoyne C	PLK4
Ginsenoyne C	PLK3
Ginsenoyne C	PLK1
Ginsenoyne C	CDK18
Ginsenoyne C	CDK17
Ginsenoyne C	CDK16
Ginsenoyne C	MTOR
Ginsenoyne C	GAK
Ginsenoyne C	CHEK1
Ginsenoyne C	AKT1
Ginsenoyne C	STK16
Ginsenoyne C	NLK
Ginsenoyne C	SELE
Ginsenoyne C	SCARB1
Ginsenoyne C	CBFB
Ginsenoyne C	RPS6KA4
Ginsenoyne C	RPS6KA3
Ginsenoyne C	PRKCA
Ginsenoyne C	PDGFRB
Ginsenoyne C	PIK3CA
Ginsenoyne C	PDE3B
Ginsenoyne C	PDE10A
Ginsenoyne C	NR4A2
Ginsenoyne C	NTRK1
Ginsenoyne C	SIRT2
Ginsenoyne C	GYS1
Ginsenoyne C	MGLL
Ginsenoyne C	MAP3K8
Ginsenoyne C	MAP3K14
Ginsenoyne C	MAPK7
Ginsenoyne C	MAPK15
Ginsenoyne C	GRM5
Ginsenoyne C	MAPK11
Ginsenoyne C	MAPK14
Ginsenoyne C	MAPK1
Ginsenoyne C	CSF1R
Ginsenoyne C	PYGL
Ginsenoyne C	ELANE
Ginsenoyne C	CXCR2
Ginsenoyne C	CXCR1
Ginsenoyne C	IRAK4
Ginsenoyne C	ICAM1
Ginsenoyne C	IKBKB
Ginsenoyne C	CHUK
Ginsenoyne C	MET
Ginsenoyne C	GSK3B
Ginsenoyne C	GSK3A
Ginsenoyne C	GABRA5
Ginsenoyne C	HSD17B2
Ginsenoyne C	HSD17B1
Ginsenoyne C	EGFR
Ginsenoyne C	EPHA5
Ginsenoyne C	CLK1
Ginsenoyne C	DYRK1B
Ginsenoyne C	TTK
Ginsenoyne C	CLK4
Ginsenoyne C	CLK3
Ginsenoyne C	CLK2
Ginsenoyne C	MAP2K1
Ginsenoyne C	CDK9
Ginsenoyne C	CDK7
Ginsenoyne C	CDK5
Ginsenoyne C	CDK3
Ginsenoyne C	CDK2
Ginsenoyne C	CDK1
Ginsenoyne C	CCKBR
Ginsenoyne C	CCNA2
Ginsenoyne C	CTSL
Ginsenoyne C	CTSB
Ginsenoyne C	CASP7
Ginsenoyne C	CASP3
Ginsenoyne C	CSNK1E
Ginsenoyne C	CES2
Ginsenoyne C	CNR2
Ginsenoyne C	CNR1
Ginsenoyne C	CALM1
Ginsenoyne C	MAPK10
Ginsenoyne C	MAPK9
Ginsenoyne C	MAPK8
Ginsenoyne C	BCL2A1
Ginsenoyne C	ALOX5
Ginsenoyne C	ADK
Ginsenoyne C	ADORA3
Ginsenoyne C	ADORA2A
Ginsenoyne C	ADORA1
Ginsenoyne C	PDPK1
Maleic acid	INMT
Maleic acid	CA2
Maleic acid	CA1
Maleic acid	CA12
Maleic acid	CA9
Maleic acid	HCAR2
Maleic acid	RXRB
Maleic acid	NR0B1
Maleic acid	CKM
Maleic acid	PPARD
Maleic acid	PTGS2
Maleic acid	CKB
Maleic acid	APOA2
Maleic acid	IL13
Maleic acid	COL27A1
Maleic acid	SLC8A1
Maleic acid	GAMT
Maleic acid	CKMT1B
Maleic acid	RARRES1
Maleic acid	TRPV1
Maleic acid	RARG
Maleic acid	PPARG
Maleic acid	FFAR1
Maleic acid	RARB
Maleic acid	RXRG
Maleic acid	FADS2
Maleic acid	FADS1
Maleic acid	SLC6A8
Maleic acid	PTGS1
Maleic acid	ACSL4
Maleic acid	CKMT2
Maleic acid	CKMT1A
Maleic acid	ELOVL4
Maleic acid	ALDH1A1
Maleic acid	RARA
Maleic acid	GPRC5A
Maleic acid	RXRA
Maleic acid	ALDH1A2
Maleic acid	ACSL3
Maleic acid	ALDH3A1
Maleic acid	IL1B
Maleic acid	TNF
Maleic acid	SLC9A1
Maleic acid	GATM
Maleic acid	SC5D
Maleic acid	SLC16A12
Maleic acid	LPCAT1
Maleic acid	SERPINB7
Maleic acid	HMOX1
Maleic acid	FH
Maleic acid	CCR3
Maleic acid	ME2
Maleic acid	ADSL
Maleic acid	SDHB
Maleic acid	GLS
Maleic acid	ME3
Maleic acid	ME1
Maleic acid	GLS2
Panaxadiol	CYP51A1
Panaxadiol	CYP19A1
Panaxadiol	SHH
Panaxadiol	SLC6A2
Panaxadiol	TACR2
Panaxadiol	SLC6A3
Panaxadiol	ALK
Panaxadiol	CRHR1
Panaxadiol	APP
Panaxadiol	KCNH2
Panaxadiol	BACE1
Panaxadiol	MDM2
Panaxadiol	F10
Panaxadiol	AVPR1A
Panaxadiol	HSD11B2
Panaxadiol	NOS2
Panaxadiol	CNR1
Panaxadiol	CNR2
Panaxadiol	CCR1
Panaxadiol	NR1I2
Panaxadiol	S1PR3
Panaxadiol	S1PR1
Panaxadiol	HCRTR2
Panaxadiol	HCRTR1
Panaxadiol	MDM4
Panaxadiol	RORC
Panaxadiol	TRPV1
Panaxadiol	ADORA1
Panaxadiol	ADORA2A
Panaxadiol	MET
Panaxadiol	GRM1
Panaxadiol	CYP24A1
Panaxadiol	AKR1C3
Panaxadiol	RORA
Panaxadiol	PFKFB3
Panaxadiol	RASGRP3
Panaxadiol	CXCR1
Panaxadiol	KIF11
Panaxadiol	GRIN2A
Panaxadiol	MAPK14
Panaxadiol	GRIA2
Panaxadiol	HMGCR
Panaxadiol	CYP17A1
Panaxadiol	LSS
Panaxadiol	SLC16A1
Panaxadiol	DHCR7
Panaxadiol	TBXAS1
Panaxadiol	PTGS1
Panaxadiol	PTGS2
Panaxadiol	MTNR1A
Panaxadiol	MTNR1B
Panaxadiol	MAPK8
Panaxadiol	INCENP
Panaxadiol	TTK
Panaxadiol	CCR2
Panaxadiol	MTOR
Panaxadiol	PIK3CA
Panaxadiol	PDE10A
Panaxadiol	CDK8
Panaxadiol	ITK
Panaxadiol	KCNA3
Panaxadiol	SMO
Panaxadiol	PYGL
Panaxadiol	CAPN2
Panaxadiol	TACR1
Panaxadiol	PRKCG
Panaxadiol	PRKCB
Panaxadiol	PRKCE
Panaxadiol	PRKCH
Panaxadiol	PRKCQ
Panaxadiol	ACKR3
Panaxadiol	F2
Panaxadiol	SLC10A2
Panaxadiol	CCNT1
Panaxadiol	AR
Panaxadiol	HSD3B1
Panaxadiol	GUCY1A2
Panaxadiol	ESR2
Panaxadiol	ESR1
Panaxadiol	HSD3B2(
Panaxadiol	ADA
Panaxatriol	CYP19A1
Panaxatriol	SHH
Panaxatriol	CYP51A1
Panaxatriol	CCR1
Panaxatriol	NR1I2
Panaxatriol	PTGS1
Panaxatriol	PTGS2
Panaxatriol	NOS2
Panaxatriol	MDM2
Panaxatriol	AVPR1A
Panaxatriol	PTGES
Panaxatriol	CHRM2
Panaxatriol	CHRM1
Panaxatriol	RASGRP3
Panaxatriol	MAPK14
Panaxatriol	FNTA
Panaxatriol	PGGT1B
Panaxatriol	PDE3A
Panaxatriol	PDE3B
Panaxatriol	BACE1
Panaxatriol	PIK3CB
Panaxatriol	ALK
Panaxatriol	F10
Panaxatriol	SMO
Panaxatriol	MTNR1A
Panaxatriol	MTNR1B
Panaxatriol	LSS
Panaxatriol	HCRTR2
Panaxatriol	HCRTR1
Panaxatriol	MET
Panaxatriol	ACKR3
Panaxatriol	CCNT1
Panaxatriol	S1PR3
Panaxatriol	S1PR1
Panaxatriol	MTOR
Panaxatriol	PIK3CA
Panaxatriol	PDE2A
Panaxatriol	PDE4B
Panaxatriol	CNR1
Panaxatriol	APP
Panaxatriol	CNR2
Panaxatriol	PRKDC
Panaxatriol	TKT
Panaxatriol	GRM1
Panaxatriol	CXCR1
Panaxatriol	PDE10A
Panaxatriol	ADORA1
Panaxatriol	ADORA2A
Panaxatriol	CRHR1
Panaxatriol	PDGFRB
Panaxatriol	KIT
Panaxatriol	MAPK8
Panaxatriol	KDR
Panaxatriol	PYGL
Panaxatriol	CCNC
Panaxatriol	SLC16A1
Panaxatriol	CDK8
Panaxatriol	GRIN2A
Panaxatriol	PIK3CD
Panaxatriol	PIK3CG
Panaxatriol	GRIA2
Panaxatriol	NTRK1
Panaxatriol	PRKCG
Panaxatriol	JAK2
Panaxatriol	PRKCB
Panaxatriol	PRKCE
Panaxatriol	PRKCH
Panaxatriol	PRKCQ
Panaxatriol	TRPV1
Panaxatriol	MAPK10
Panaxatriol	MAPK9
Panaxatriol	ACACB
Panaxatriol	SLC6A2
Panaxatriol	TACR2
Panaxatriol	SLC6A3
Panaxatriol	CDK2
Panaxatriol	MAPK1
Panaxatriol	ROS1
Panaxatriol	MDM4
Panaxatriol	CAPN2
Panaxatriol	GRM5
Panaxatriol	AKR1C3
Panaxatriol	DGAT1
Panaxatriol	ITGAL
Panaxatriol	CDK9
Panaxatriol	GCK
Panaxatriol	RPS6KB1
Panaxatriol	AURKA
Panaxatriol	SYK
Panaxatriol	CCND1
Panaxatriol	GSK3B
Panaxatriol	CYP2D6
Panaxatriol	ROCK2
Panaxatriol	ROCK1
Panaxatriol	CYP2C9
Panaxatriol	CYP3A4
Panaxatriol	CYP2C19
Panaxatriol	CHEK1
Panaxatriol	KCNA3
Panaxatriol	AR
Panaxatriol	HSD3B1
Panaxatriol	GUCY1A2
Panaxatriol	ESR2
Panaxatriol	ESR1
Panaxatriol	HSD3B2(
Panaxatriol	ADA
Vina ginsenoside R1	PSEN2
Vina ginsenoside R1	VEGFA
Vina ginsenoside R1	FGF1
Vina ginsenoside R1	FGF2
Vina ginsenoside R1	HPSE
Vina ginsenoside R1	STAT3
Vina ginsenoside R1	GLRA1
Vina ginsenoside R1	GLRA2
Vina ginsenoside R1	HTR2B
Vina ginsenoside R1	DRD1
Vina ginsenoside R1	CYP2D6
Vina ginsenoside R1	HTR6
Vina ginsenoside R1	HTR1B
Vina ginsenoside R1	ABCB1
Vina ginsenoside R1	PPM1A
Vina ginsenoside R1	LGALS4
Vina ginsenoside R1	LGALS3
Vina ginsenoside R1	LGALS8
Vina ginsenoside R1	FDFT1
Vina ginsenoside R1	SLC28A2
Vina ginsenoside R1	SLC5A1
Vina ginsenoside R1	MLNR
Vina ginsenoside R1	CDK1
Vina ginsenoside R1	PTAFR
Vina ginsenoside R1	RORC
Vina ginsenoside R1	LGALS9
Vina ginsenoside R1	ADRA1A
Vina ginsenoside R1	ATP1A1
