# Supplementary material for: Elucidation of the Mechanism of Action of Ginseng Against Acute Lung Injury/Acute Respiratory Distress Syndrome by a Network Pharmacology-Based Strategy
Source: Front Pharmacol. 2021 Jan 20;11:611794. doi: 10.3389/fphar.2020.611794 (PMC7970560; doi:10.3389/fphar.2020.611794)
Supplement: Supplementary file 3 [file datasheet3.xlsx]

## Sheet: Sheet1
Supplementary Datasheet S3 The topological feature values of the 69 key targets
Target name	Betweenness Centrality	Closeness Centrality	Degree
AKT1	0.118122	0.672131	111
EGFR	0.0411477	0.599415	79
TNF	0.0409286	0.608309	86
VEGFA	0.0406903	0.619335	94
APP	0.0383954	0.554054	65
CASP3	0.0330669	0.599415	81
MAPK3	0.0315284	0.60472	88
F2	0.0303788	0.524297	39
STAT3	0.0278883	0.57423	72
HSP90AA1	0.0244215	0.571031	65
PTGS2	0.0204097	0.567867	68
ABCB1	0.0197401	0.5125	34
CYP3A4	0.0197286	0.516373	33
MAPK1	0.0192331	0.579096	71
PPARG	0.0183348	0.533854	46
JUN	0.0166025	0.569444	67
PIK3CA	0.016378	0.551075	58
MAPK8	0.0160945	0.569444	68
IL1B	0.0158958	0.552561	64
AR	0.0155219	0.521629	44
ESR1	0.0138759	0.545213	55
G6PD	0.0135172	0.488095	22
PPARA	0.0127625	0.498783	24
CNR1	0.0125501	0.5125	40
HTR1A	0.0125371	0.480094	35
GRM5	0.0122355	0.495169	37
NR3C1	0.0120907	0.529716	40
TYMS	0.0119001	0.473441	19
MMP9	0.0110928	0.545213	60
IL2	0.0106929	0.545213	57
CYP19A1	0.00995582	0.502451	27
CFTR	0.00974884	0.473441	20
ALK	0.00962538	0.484634	24
MTOR	0.00953225	0.555556	61
REN	0.00873086	0.506173	34
CDK4	0.00850939	0.5	34
DRD1	0.00811735	0.481221	22
CCND1	0.00727761	0.549598	58
PTPN11	0.00715202	0.502451	44
IL13	0.0070338	0.498783	41
KIT	0.00696101	0.528351	45
VDR	0.00690681	0.475638	20
BCL2L1	0.00676944	0.536649	51
KDR	0.0067232	0.528351	49
JAK2	0.00575188	0.518987	48
CYP2C9	0.00572556	0.46697	19
MDM2	0.00572409	0.524297	43
PIK3CD	0.00535005	0.484634	25
CCR2	0.00530454	0.5	40
PRKCA	0.00486571	0.497573	30
ADRA1A	0.00475978	0.462754	22
CHEK1	0.00471984	0.476744	26
CXCR2	0.00468663	0.503686	38
AGTR1	0.00453556	0.5	31
GSK3B	0.00447842	0.50995	37
RPS6KB1	0.00443041	0.517677	45
TERT	0.00438658	0.488095	28
ICAM1	0.00389724	0.508685	48
NOS2	0.00377031	0.477855	26
OPRD1	0.00349267	0.465909	28
FGF2	0.00335705	0.535248	52
SYK	0.00328553	0.481221	30
PGR	0.00325154	0.507426	36
CXCR3	0.00319667	0.484634	31
MAPK14	0.00305091	0.525641	49
ESR2	0.00286326	0.482353	24
ADORA1	0.00269495	0.485782	27
ENSG00000196689	0.00251228	0.486936	25
ADORA3	0.00249054	0.483491	25
